# Supplementary material
Source: MDPI journal article supplement (https://www.mdpi.com/2813-4346/2/2/19)
Supplement: s1 [file s1]

Archive with 1 entries (1 files):
- higheredu-2296919-supplementary.pdf
